# Supplementary material for: Development of the PGx‐Passport: A Panel of Actionable Germline Genetic Variants for Pre‐Emptive Pharmacogenetic Testing
Source: PubMed Central journal article supplement — Clin Pharmacol Ther. 2019 Jun 12;106(4):866–73. doi: 10.1002/cpt.1489 (PMC6771671; doi:10.1002/cpt.1489), 2019-06-12
Supplement: CPT-106-866-s001.pdf [file CPT-106-866-s001.pdf]

**Table S1:** An example of an operationalized panel fit for genotyping platforms, for a subset of genes in the PGx -Passport

| Genes          | Defining variant dbSNP RS ID | Genomic position                                            | Allele | Effect on protein | Allele Functional Status            | Drug for which actionable DPWG guideline is available                                                                               |
|----------------|------------------------------|-------------------------------------------------------------|--------|-------------------|-------------------------------------|-------------------------------------------------------------------------------------------------------------------------------------|
| <i>CYP2B6</i>  | rs2279343;<br>rs3745274      | NC_000019.9:g.41515263A>G;<br>NC_000019.9:g.41512841G>T     | *6     |                   | Decreased function or No function   | Efavirenz                                                                                                                           |
| <i>CYP2B6</i>  | rs3745274                    | NC_000019.9:g.41512841G>T                                   | *9     | Q172H             | Decreased function or No function   |                                                                                                                                     |
| <i>CYP2B6</i>  | rs2279343                    | NC_000019.9:g.41515263A>G                                   | *4     | K262R             | Decreased function or No function   |                                                                                                                                     |
| <i>CYP2B6</i>  | rs2279343;<br>rs28399499     | NC_000019.9:g.41515263A>G;<br>NC_000019.9:g.41518221T>C     | *16    |                   | Decreased function or No function   |                                                                                                                                     |
| <i>CYP2B6</i>  | rs28399499                   | NC_000019.9:g.41518221T>C                                   | *18    | I328T             | Decreased function or No function   |                                                                                                                                     |
| <i>CYP2B6</i>  | rs3211371                    | NC_000019.9:g.41522715C>T                                   | *5     |                   | Decreased function or Full function |                                                                                                                                     |
| <i>CYP2C9</i>  | rs1799853                    | NC_000010.10:g.96702047C>T                                  | *2     | R144C             | Decreased function                  | Phenytoin<br>Warfarin                                                                                                               |
| <i>CYP2C9</i>  | rs1057910                    | NC_000010.10:g.96741053A>C                                  | *3     | I359L             | Decreased function                  |                                                                                                                                     |
| <i>CYP2C9</i>  | rs28371686                   | NC_000010.10:g.96741058C>G                                  | *5     | D360E             | Decreased function                  |                                                                                                                                     |
| <i>CYP2C9</i>  | rs28371685                   | NC_000010.10:g.96740981C>T                                  | *11    | R335W             | Decreased function                  |                                                                                                                                     |
| <i>CYP2C19</i> | rs4244285                    | NC_000010.10:g.96541616G>A                                  | *2     | Splicing defect   | No function                         | Clopidogrel<br>Citalopram<br>Escitalopram<br>Sertraline<br>Imipramine<br>Lansoprazole<br>Omeprazole<br>Pantoprazole<br>Voriconazole |
| <i>CYP2C19</i> | rs4986893                    | NC_000010.10:g.96540410G>A                                  | *3     | W212X             | No function                         |                                                                                                                                     |
| <i>CYP2C19</i> | rs28399504                   | NC_000010.10:g.96522463A>G                                  | *4A/B  | M1V               | No function                         |                                                                                                                                     |
| <i>CYP2C19</i> | rs56337013                   | NC_000010.10:g.96612495C>T                                  | *5     | R433W             | No function                         |                                                                                                                                     |
| <i>CYP2C19</i> | rs72552267                   | NC_000010.10:g.96535210G>A                                  | *6     | R132Q             | No function                         |                                                                                                                                     |
| <i>CYP2C19</i> | rs41291556                   | NC_000010.10:g.96535173T>C                                  | *8     | W120R             | Decreased function or No function   |                                                                                                                                     |
| <i>CYP2C19</i> | rs17884712                   | NC_000010.10:g.96535246G>A                                  | *9     | R144H             | Decreased function                  |                                                                                                                                     |
| <i>CYP2C19</i> | rs6413438                    | NC_000010.10:g.96541615C>T                                  | *10    | P227L             | Decreased function                  |                                                                                                                                     |
| <i>CYP2C19</i> | rs12248560                   | NC_000010.10:g.96521657C>T                                  | *17    | X                 | Increased function                  |                                                                                                                                     |
| <i>CYP2D6</i>  | X                            |                                                             | *xN    | X                 | Increased function                  |                                                                                                                                     |
| <i>CYP2D6</i>  | rs35742686                   | NC_000022.10:g.42524244delT                                 | *3     | 259Frameshift     | No function                         |                                                                                                                                     |
| <i>CYP2D6</i>  | rs3892097;<br>(rs1065852)    | NC_000022.10:g.42524947C>T;<br>(NC_000022.10:g.42526694G>A) | *4     | Splicing defect   | No function                         |                                                                                                                                     |
| <i>CYP2D6</i>  | X                            | X                                                           | *5     | Gene deletion     | No function                         |                                                                                                                                     |
| <i>CYP2D6</i>  | rs5030655                    | NC_000022.10:g.42525086delA                                 | *6     | 118Frameshift     | No function                         |                                                                                                                                     |
| <i>CYP2D6</i>  | rs5030865                    | NC_000022.10:g.42525035C>A                                  | *8     | G169X             | No function                         |                                                                                                                                     |

|                |                         |                                                           |            |                 |                      |                                                                                                                                |
|----------------|-------------------------|-----------------------------------------------------------|------------|-----------------|----------------------|--------------------------------------------------------------------------------------------------------------------------------|
| <i>CYP2D6</i>  | rs5030656               | NC_000022.10:g.42524176delCTT                             | *9         | K281 deletion   | Decreased function   | Metoprolol<br>Nortriptyline<br>Paroxetine<br>Pimozide<br>Propafenone<br>Tamoxifen<br>Tramadol<br>Venlafaxine<br>Zuclopenthixol |
| <i>CYP2D6</i>  | rs1065852               | NC_000022.10:g.42526694G>A                                | *10        | P34S            | Decreased function   |                                                                                                                                |
| <i>CYP2D6</i>  | rs5030865;<br>rs1065852 | NC_000022.10:g.42525035C>T;<br>NC_000022.10:g.42526694G>A | *14A       | G169R           | Decreased function   |                                                                                                                                |
| <i>CYP2D6</i>  | rs5030865               | NC_000022.10:g.42525035C>T                                | *14B       |                 | Decreased function   |                                                                                                                                |
| <i>CYP2D6</i>  | rs28371706              | NC_000022.10:g.42525772G>A                                | *17        | T107I           | Decreased function   |                                                                                                                                |
| <i>CYP2D6</i>  | rs28371725              | NC_000022.10:g.42523805C>T                                | *41        | Splicing        | Decreased function   |                                                                                                                                |
| <i>CYP3A5</i>  | rs776746                | NC_000007.13:g.99270539C>T                                | *3         | Splicing defect | No function          | Tacrolimus                                                                                                                     |
| <i>CYP3A5</i>  | rs10264272              | NC_000007.13:g.99262835C>T                                | *6         | Splicing defect | No function          |                                                                                                                                |
| <i>CYP3A5</i>  | rs41303343              | NC_000007.13:g.99250393_99250394insA                      | *7         | 346Frameshift   | No function          |                                                                                                                                |
| <i>DPYD</i>    | rs3918290               | NC_000001.10:g.97915614C>T                                | *2A        | X               | No function          | 5-Fluorouracil<br>Capecitabine<br>Tegafur                                                                                      |
| <i>DPYD</i>    | rs55886062              | NC_000001.10:g.97981343A>C                                | *13        | I560S           | No function          |                                                                                                                                |
| <i>DPYD</i>    | rs67376798              | NC_000001.10:g.97547947T>A                                | X          | D949V           | Decreased function   |                                                                                                                                |
| <i>DPYD</i>    | rs56038477              | NC_000001.10:g.98039419C>T                                | X          | E412E           | Decreased function   |                                                                                                                                |
| <i>F5</i>      | rs6025                  | NC_000001.10:g.169519049T>C                               | X          | R506Q           | Decreased function   | Estrogen contraceptive agents                                                                                                  |
| <i>HLA-B</i>   | rs2395029               | NC_000006.11:g.31431780T>G                                | *57:01     | Tagging SNP     | High-risk allele     | Abacavir<br>Flucloxacillin                                                                                                     |
| <i>SLCO1B1</i> | rs4149056               | NC_000012.11:g.21331549T>C                                | *5/*15/*17 | V174A           | Decreased function   | Atorvastatin<br>Simvastatin                                                                                                    |
| <i>TPMT</i>    | rs1800462               | NC_000006.11:g.18143955C>G                                | *2         | A80P            | No function          | 6-Mercaptopurine<br>Azathioprine<br>Thioguanine                                                                                |
| <i>TPMT</i>    | rs1142345;<br>rs1800460 | NC_000006.11:g.18130918T>C;<br>NC_000006.11:g.18139228C>T | *3A        | Y240C<br>A154T  | No function          |                                                                                                                                |
| <i>TPMT</i>    | rs1800460               | NC_000006.11:g.18139228C>T                                | *3B        | A154T           | No function          |                                                                                                                                |
| <i>TPMT</i>    | rs1142345               | NC_000006.11:g.18130918T>C                                | *3C        | Y240C           | No function          |                                                                                                                                |
| <i>UGT1A1</i>  | rs4148323               | NC_000002.11:g.234669144G>A                               | *6         | G71R            | Decreased function   | Irinotecan                                                                                                                     |
| <i>UGT1A1</i>  | rs35350960              | NC_000002.11:g.234669619C>A                               | *27        | P229Q           | Decreased function   |                                                                                                                                |
| <i>UGT1A1</i>  | rs8175347               | NC_000002.11:g.234668881_234668882TA[7]                   | *28        | X               | Decreased function   |                                                                                                                                |
| <i>UGT1A1</i>  | rs8175347               | NC_000002.11:g.234668881_234668882TA[8]                   | *37        | X               | Decreased function   |                                                                                                                                |
| <i>VKORC1</i>  | rs9934438               | NC_000016.9:g.31104878G>A                                 | X          |                 | Decreased expression | Acenocoumarol<br>Phenprocoumon<br>Warfarin                                                                                     |
