# Supplementary material for: Development of the PGx‐Passport: A Panel of Actionable Germline Genetic Variants for Pre‐Emptive Pharmacogenetic Testing
Source: PubMed Central journal article supplement — Clin Pharmacol Ther. 2019 Jun 12;106(4):866–73. doi: 10.1002/cpt.1489 (PMC6771671; doi:10.1002/cpt.1489), 2019-06-12
Supplement: CPT-106-866-s003.pdf [file CPT-106-866-s003.pdf]

**Table S3:** DPWG guidelines (n=97): covering 82 drugs and 19 genes, at the time of updated selection (25/01/2019)

|    |                                                |
|----|------------------------------------------------|
| 1  | Abacavir - <i>HLA-B*57:01</i>                  |
| 2  | Contraceptive with ethinylestadiol – <i>F5</i> |
| 3  | Zuclopenthixol - <i>CYP2D6</i>                 |
| 4  | Amitriptyline - <i>CYP2D6</i>                  |
| 5  | Clomipramine - <i>CYP2D6</i>                   |
| 6  | Imipramine - <i>CYP2D6</i>                     |
| 7  | Nortriptyline - <i>CYP2D6</i>                  |
| 8  | Venlafaxine - <i>CYP2D6</i>                    |
| 9  | Doxepin - <i>CYP2D6</i>                        |
| 10 | Atorvastatin - <i>SLCO1B1</i>                  |
| 11 | Oxycodone - <i>CYP2D6</i>                      |
| 12 | Tramadol - <i>CYP2D6</i>                       |
| 13 | Codeine - <i>CYP2D6</i>                        |
| 14 | Efavirenz - <i>CYP2B6</i>                      |
| 15 | Flucloxacillin - <i>HLA-B*57:01</i>            |
| 16 | Fluorouracil/capecitabine - <i>DPYD</i>        |
| 17 | Azathioprine/mercaptopurine - <i>TPMT</i>      |
| 18 | Tioguanine - <i>TPMT</i>                       |
| 19 | Tacrolimus - <i>CYP3A5</i>                     |
| 20 | Tegafur - <i>DPYD</i>                          |
| 21 | Metoprolol - <i>CYP2D6</i>                     |
| 22 | Citalopram - <i>CYP2C19</i>                    |
| 23 | Escitalopram - <i>CYP2C19</i>                  |
| 24 | Simvastatin - <i>SLCO1B1</i>                   |
| 25 | Flecainide - <i>CYP2D6</i>                     |
| 26 | Propafenone - <i>CYP2D6</i>                    |
| 27 | Phenytoin - <i>CYP2C9</i>                      |
| 28 | Carbamazepine – <i>HLA-B*15:02</i>             |
| 29 | Carbamazepine – <i>HLA-A*31:01</i>             |
| 30 | Carbamazepine – <i>HLA-B*15:11</i>             |
| 31 | Eliglustat - <i>CYP2D6</i>                     |
| 32 | Allopurinol – <i>HLA-B*58:01</i>               |
| 33 | Voriconazole - <i>CYP2C19</i>                  |
| 34 | Aripiprazole - <i>CYP2D6</i>                   |
| 35 | Haloperidol - <i>CYP2D6</i>                    |
| 36 | Lansoprazole - <i>CYP2C19</i>                  |
| 37 | Omeprazole - <i>CYP2C19</i>                    |
| 38 | Pantoprazole - <i>CYP2C19</i>                  |
| 39 | Irinotecan - <i>UGT1A1</i>                     |
| 40 | Pimozide - <i>CYP2D6</i>                       |
| 41 | Tamoxifen - <i>CYP2D6</i>                      |
| 42 | Acenocoumarol - <i>VKORC1</i>                  |

|    |                                         |
|----|-----------------------------------------|
| 43 | Phenprocoumon - <i>VKORC1</i>           |
| 44 | Paroxetine - <i>CYP2D6</i>              |
| 45 | Sertraline - <i>CYP2C19</i>             |
| 46 | Clopidogrel - <i>CYP2C19</i>            |
| 47 | Warfarin - <i>CYP2C9</i>                |
| 48 | Warfarin - <i>VKORC1</i>                |
| 49 | Atomoxetine - <i>CYP2D6</i>             |
| 50 | Imipramine - <i>CYP2C19</i>             |
| 51 | Ribavirin - <i>HLA-B*44</i>             |
| 52 | Olanzapine - <i>CYP2D6</i>              |
| 53 | Atenolol - <i>CYP2D6</i>                |
| 54 | Bisoprolol - <i>CYP2D6</i>              |
| 55 | Fluphenazine - <i>CYP2D6</i>            |
| 56 | Quetiapine - <i>CYP2D6</i>              |
| 57 | Flupentixol - <i>CYP2D6</i>             |
| 58 | Duloxetine - <i>CYP2D6</i>              |
| 59 | Prasugrel - <i>CYP2C19</i>              |
| 60 | Rabeprazole - <i>CYP2C19</i>            |
| 61 | Glibenclamide - <i>CYP2C9</i>           |
| 62 | Gliclazide - <i>CYP2C9</i>              |
| 63 | Glimepiride - <i>CYP2C9</i>             |
| 64 | Tolbutamide - <i>CYP2C9</i>             |
| 65 | Fluvoxamine - <i>CYP2C19</i>            |
| 66 | Mirtazapine - <i>CYP2C19</i>            |
| 67 | Sertraline - <i>CYP2D6</i>              |
| 68 | Ticagrelor - <i>CYP2C19</i>             |
| 69 | Moclobemide - <i>CYP2C19</i>            |
| 70 | Citalopram/escitalopram - <i>CYP2D6</i> |
| 71 | Mirtazapine - <i>CYP2D6</i>             |
| 72 | Fluvastatin - <i>SLCO1B1</i>            |
| 73 | Acenocoumarol - <i>CYP2C9</i>           |
| 74 | Phenprocoumon - <i>CYP2C9</i>           |
| 75 | Gefitinib - <i>CYP2D6</i>               |
| 76 | Risperidone - <i>CYP2D6</i>             |
| 77 | Methotrexate - <i>MTHFR</i>             |
| 78 | Clozapine - <i>CYP2D6</i>               |
| 79 | Quetiapine - <i>CYP3A4</i>              |
| 80 | Fluvoxamine - <i>CYP2D6</i>             |
| 81 | Fluoxetine - <i>CYP2D6</i>              |
| 82 | Carvedilol - <i>CYP2D6</i>              |
| 83 | Amiodaron - <i>CYP2D6</i>               |
| 84 | Clonidine - <i>CYP2D6</i>               |
| 85 | Disopyramide - <i>CYP2D6</i>            |
| 86 | Quinidine - <i>CYP2D6</i>               |

|    |                                              |
|----|----------------------------------------------|
| 87 | Methylphenidate - <i>CYP2D6</i>              |
| 88 | Sotalol - <i>CYP2D6</i>                      |
| 89 | Clozapine - <i>CYP1A2</i>                    |
| 90 | Olanzapine - <i>CYP1A2</i>                   |
| 91 | Methylfenidaat - <i>COMT</i>                 |
| 92 | Esomeprazole - <i>CYP2C19</i>                |
| 93 | Azathiopurine/mercaptopurine - <i>NUDT15</i> |
| 94 | Tioguanine - <i>NUDT15</i>                   |
| 95 | Lamotrigine – <i>HLA-B*15:02</i>             |
| 96 | Phenytoin – <i>HLA-B*15:02</i>               |
| 97 | Oxcarbazepine – <i>HLA-B*15:02</i>           |
