# Supplementary material for: Development of the PGx‐Passport: A Panel of Actionable Germline Genetic Variants for Pre‐Emptive Pharmacogenetic Testing
Source: PubMed Central journal article supplement — Clin Pharmacol Ther. 2019 Jun 12;106(4):866–73. doi: 10.1002/cpt.1489 (PMC6771671; doi:10.1002/cpt.1489), 2019-06-12
Supplement: CPT-106-866-s004.pdf [file CPT-106-866-s004.pdf]

**Table S4:** DPWG guidelines which had an actionable therapeutic recommendation for at least one of the predicted phenotypes (n=54): covering 49 drugs and 14 genes, at the time of updated selection (25/01/2019)

|    |                                                |
|----|------------------------------------------------|
| 1  | Abacavir – <i>HLA-B*57:01</i>                  |
| 2  | Contraceptive with ethinylestadiol – <i>F5</i> |
| 3  | Zuclopenthixol - <i>CYP2D6</i>                 |
| 4  | Amitriptyline - <i>CYP2D6</i>                  |
| 5  | Clomipramine - <i>CYP2D6</i>                   |
| 6  | Imipramine - <i>CYP2D6</i>                     |
| 7  | Nortriptyline - <i>CYP2D6</i>                  |
| 8  | Venlafaxine - <i>CYP2D6</i>                    |
| 9  | Doxepin - <i>CYP2D6</i>                        |
| 10 | Atorvastatin - <i>SLCO1B1</i>                  |
| 11 | Tramadol - <i>CYP2D6</i>                       |
| 12 | Codeine - <i>CYP2D6</i>                        |
| 13 | Efavirenz - <i>CYP2B6</i>                      |
| 14 | Flucloxacillin - <i>HLA-B*57:01</i>            |
| 15 | Fluorouracil/capecitabine - <i>DPYD</i>        |
| 16 | Azathioprine/mercaptopurine - <i>TPMT</i>      |
| 17 | Tioguanine - <i>TPMT</i>                       |
| 18 | Tacrolimus - <i>CYP3A5</i>                     |
| 19 | Tegafur - <i>DPYD</i>                          |
| 20 | Metoprolol - <i>CYP2D6</i>                     |
| 21 | Citalopram - <i>CYP2C19</i>                    |
| 22 | Escitalopram - <i>CYP2C19</i>                  |
| 23 | Simvastatin - <i>SLCO1B1</i>                   |
| 24 | Flecainide - <i>CYP2D6</i>                     |
| 25 | Propafenone - <i>CYP2D6</i>                    |
| 26 | Phenytoin - <i>CYP2C9</i>                      |
| 27 | Carbamazepine – <i>HLA-B*15:02</i>             |
| 28 | Carbamazepine – <i>HLA-A*31:01</i>             |
| 29 | Carbamazepine – <i>HLA-B*15:11</i>             |
| 30 | Eliglustat - <i>CYP2D6</i>                     |
| 31 | Allopurinol – <i>HLA-B*58:01</i>               |
| 32 | Voriconazole - <i>CYP2C19</i>                  |
| 33 | Aripiprazole - <i>CYP2D6</i>                   |
| 34 | Haloperidol - <i>CYP2D6</i>                    |
| 35 | Lansoprazole - <i>CYP2C19</i>                  |
| 36 | Omeprazole - <i>CYP2C19</i>                    |
| 37 | Pantoprazole - <i>CYP2C19</i>                  |
| 38 | Irinotecan - <i>UGT1A1</i>                     |
| 39 | Pimozide - <i>CYP2D6</i>                       |
| 40 | Tamoxifen - <i>CYP2D6</i>                      |
| 41 | Acenocoumarol - <i>VKORC1</i>                  |

|    |                                             |
|----|---------------------------------------------|
| 42 | Phenprocoumon - <i>VKORC1</i>               |
| 43 | Paroxetine - <i>CYP2D6</i>                  |
| 44 | Sertraline - <i>CYP2C19</i>                 |
| 45 | Clopidogrel - <i>CYP2C19</i>                |
| 46 | Warfarin - <i>CYP2C9</i>                    |
| 47 | Warfarin - <i>VKORC1</i>                    |
| 48 | Atomoxetine - <i>CYP2D6</i>                 |
| 49 | Imipramine - <i>CYP2C19</i>                 |
| 50 | Azathioprine/mercaptopurine - <i>NUDT15</i> |
| 51 | Tioguanine - <i>NUDT15</i>                  |
| 52 | Lamotrigine – <i>HLA-B*15:02</i>            |
| 53 | Phenytoin – <i>HLA-B*15:02</i>              |
| 54 | Oxcarbazepine – <i>HLA-B*15:02</i>          |
