# Supplementary material for: Development of the PGx‐Passport: A Panel of Actionable Germline Genetic Variants for Pre‐Emptive Pharmacogenetic Testing
Source: PubMed Central journal article supplement — Clin Pharmacol Ther. 2019 Jun 12;106(4):866–73. doi: 10.1002/cpt.1489 (PMC6771671; doi:10.1002/cpt.1489), 2019-06-12
Supplement: CPT-106-866-s005.pdf [file CPT-106-866-s005.pdf]

**Table S5:** References used to compile variants in actionable pharmacogenes (n=13). Accessed in March 2016.

| Gene                   | References accessed       |                       |                  |                 |            | Pharmacogenomics.<br>phaulaval.ca | Variant alleles reported                                                                                                                                                                                                                                                                                                                                       |
|------------------------|---------------------------|-----------------------|------------------|-----------------|------------|-----------------------------------|----------------------------------------------------------------------------------------------------------------------------------------------------------------------------------------------------------------------------------------------------------------------------------------------------------------------------------------------------------------|
|                        | DPWG guidelines monograph | PharmGKB.org and CPIC | CYPalleles.ki.se | HLA.alleles.org | IMH.liu.se |                                   |                                                                                                                                                                                                                                                                                                                                                                |
| <i>CYP2B6</i>          | X                         | X                     | X                |                 |            |                                   | *6, *5, *16, *18                                                                                                                                                                                                                                                                                                                                               |
| <i>CYP2C9</i>          | X                         | X                     | X                |                 |            |                                   | *2, *3, *4, *5, *6, *7, *8, *11                                                                                                                                                                                                                                                                                                                                |
| <i>CYP2C19</i>         | X                         | X                     | X                |                 |            |                                   | *1, *2, *3, *4A, *4B, *5, *6, *7, *8, *9, *10, *16, *17, *19, *22, *24, *25, *26                                                                                                                                                                                                                                                                               |
| <i>CYP2D6</i>          | X                         | X                     | X                |                 |            |                                   | *1xN (2-13), *2xN (2-13), *3, *4, *4xN, *5, *6, *6xN, *7, *8, *9, *9xN, *10, *10xN, *11, *12, *13, *14A, *14B, *15, *16, *17, *17xN, *18, *19, *20, *21, *29, *29xN, *31, *33xN, *36, *38, *40, *41, *41xN, *42, *44, *45xN, *47, *50, *51, *53, *54, *55, *56A, *56B, *57, *59, *62, *66, *67, *68A, *68B, *69, *72, *76, *77, *78, *79, *80, *92, *100, *101 |
| <i>CYP3A5</i>          | X                         | X                     | X                |                 |            |                                   | *1, *2, *3, *4, *5, *6, *7                                                                                                                                                                                                                                                                                                                                     |
| <i>DPYD</i>            | X                         | X                     |                  |                 |            |                                   | *1, *2A, *3, *4, *5, *6, *7, *8, *9A, *9B, *10, *11, *12, *13, *16, *17, *18, *19, *20, *21, 2846A>T, 1236G>A,                                                                                                                                                                                                                                                 |
| <i>F5</i>              | X                         | X                     |                  |                 |            |                                   | 1691G>A                                                                                                                                                                                                                                                                                                                                                        |
| <i>HLA-A and HLA-B</i> | X                         | X                     |                  | X               |            |                                   | HLA-B*57:01, HLA-B*15:02, HLA-A*31:01, HLA-B*15:11                                                                                                                                                                                                                                                                                                             |
| <i>SLCO1B1</i>         | X                         | X                     |                  |                 |            |                                   | *1, *1B, *4, *16, *5/*15/*17                                                                                                                                                                                                                                                                                                                                   |
| <i>TPMT</i>            | X                         | X                     |                  |                 | X          |                                   | *1, *1A, *1S, *2, *3A/*3B/*3D, *3D, *4, *5, *6, *7, *8, *9, *10, *11, *12, *13, *14, *15, *16, *17, *18                                                                                                                                                                                                                                                        |
| <i>UGT1A1</i>          | X                         | X                     |                  |                 |            | X                                 | *1, *2, *3, *4, *5, *6, *7, *8, *9, *10, *11, *12, *13, *14, *15, *16, *17, *18, *19, *20, *21, *22, *23, *24, *25, *26, *27, *28, *29, *30, *31, *32, *33, *34, *35, *36, *37                                                                                                                                                                                 |
| <i>VKORC1</i>          | X                         | X                     |                  |                 |            |                                   | -1639G>A, 1173C>T                                                                                                                                                                                                                                                                                                                                              |
